# Supplementary material for: The investigation of 125I seed implantation as a salvage modality for unresectable pancreatic carcinoma
Source: PubMed Central journal article supplement (PMC3892087; doi:10.1186/1756-9966-32-106), 2013-12-27
Supplement: 1756-9966-32-106-S1.pdf [file 1756-9966-32-106-S1.pdf]

**Additional Table 1.**

**Characteristics of Patients and Treatment**

| No | Gender | Age | Stage | TNM stage | Location | KPS | Jaundice | Lesion dimensions (cm) | Surgery                                        | Seed activity (mCi) | Number of seeds | Adjuvant EBRT | Adjuvant CT (number of cycles) | Other treatment |
|----|--------|-----|-------|-----------|----------|-----|----------|------------------------|------------------------------------------------|---------------------|-----------------|---------------|--------------------------------|-----------------|
| 1  | M      | 53  | II    | T3N0M0    | Head     | 80  | Yes      | 3.0×3.0×3.0            | No                                             | 0.4                 | 23              | No            | No                             | PTCD+Stent      |
| 2  | F      | 71  | II    | T3N0M0    | Head     | 80  | No       | 3.9×2.8×2.8            | No                                             | 0.4                 | 24              | No            | No                             | PTCD+Stent      |
| 3  | F      | 43  | II    | T3N0M0    | Whole    | 90  | No       | 3.0×4.0×5.0            | No                                             | 0.5                 | 73              | 50Gy/25f      | GEM(6)                         | No              |
| 4  | F      | 66  | II    | T3N1M0    | Head     | 80  | No       | 3.0×4.0×4.0            | No                                             | 0.5                 | 28              | No            | No                             | No              |
| 5  | F      | 38  | II    | T3N1M0    | Head     | 70  | Yes      | 4.0×4.0×4.0            | Biliary enteric anastomosis                    | 0.5                 | 38              | No            | No                             | PTCD+Stent      |
| 6  | F      | 64  | II    | T3N0M0    | Head     | 80  | Yes      | 4.5×3.0×3.0            | Biliary enteric anastomosis +gastrojejunostomy | 0.4                 | 19              | 35Gy/17f      | PTX(2)                         | No              |
| 7  | M      | 65  | II    | T3N0M0    | Head     | 80  | Yes      | 5.0×5.0×4.5            | Biliary enteric anastomosis                    | 0.6                 | 34              | No            | No                             | No              |
| 8  | M      | 75  | II    | T3N0M0    | Head     | 70  | Yes      | 3.0×3.0×3.0            | Biliary enteric anastomosis                    | 0.5                 | 10              | No            | No                             | No              |
| 9  | M      | 54  | II b  | T2N1M0    | Head     | 80  | Yes      | 5.5×3.0×4.5            | No                                             | 0.5                 | 51              | No            | No                             | No              |
| 10 | M      | 71  | III   | T4N0M0    | Body     | 80  | Yes      | 4.8×4.0×2.5            | No                                             | 0.49                | 50              | No            | GEM(1)                         | PTCD+Stent      |
| 11 | M      | 46  | III   | T4N0M0    | Whole    | 70  | No       | 5.0×8.0×5.0            | No                                             | 0.5                 | 75              | 40Gy/20f      | GEM(4)                         | No              |
| 12 | F      | 56  | III   | T4N0M0    | Body     | 80  | No       | 4.0×4.0×4.0            | No                                             | 0.5                 | 49              | No            | GEM(3)                         | No              |
| 13 | M      | 52  | III   | T4N1M0    | Body     | 80  | No       | 6.0×5.0×4.0            | No                                             | 0.6                 | 44              | 50Gy/25f      | No                             | No              |
| 14 | F      | 48  | III   | T4N0M0    | Head     | 80  | Yes      | 4.1×4.0×4.0            | Biliary enteric anastomosis +gastrojejunostomy | 0.5                 | 28              | 40Gy/20f      | GEM(2)<br>PTX(2)               | No              |
| 15 | M      | 62  | III   | T3N1M0    | Head     | 70  | Yes      | 2.5×3.0×3.3            | Biliary enteric anastomosis                    | 0.5                 | 20              | No            | GEM(1)                         | No              |

|    |   |    |     |        |      |    |     |             |                                                      |      |    |          |        |            |
|----|---|----|-----|--------|------|----|-----|-------------|------------------------------------------------------|------|----|----------|--------|------------|
| 16 | M | 41 | III | T4N0M0 | Head | 80 | No  | 5.0×4.0×4.0 | No                                                   | 0.5  | 58 | No       | No     | No         |
| 17 | F | 56 | III | T4N1M0 | Body | 80 | No  | 6.5×2.6×2.0 | No                                                   | 0.5  | 48 | No       | GEM(6) | No         |
| 18 | M | 46 | III | T4N0M0 | Head | 80 | No  | 3.0×2.0×2.0 | No                                                   | 0.46 | 33 | 50Gy/25f | No     | No         |
| 19 | M | 90 | III | T3N1M0 | Body | 70 | No  | 6.5×4.5×2.5 | No                                                   | 0.5  | 45 | No       | No     | No         |
| 20 | M | 43 | III | T4N0M0 | Body | 80 | Yes | 4.0×4.0×4.0 | No                                                   | 0.5  | 31 | No       | No     | PTCD+Stent |
| 21 | M | 62 | III | T4N1M0 | Head | 70 | Yes | 3.8×3.7×5.7 | Biliary enteric<br>anastomosis<br>+gastrojejunostomy | 0.5  | 48 | 45Gy/25f | No     | No         |
| 22 | M | 63 | III | T4N0M0 | Head | 80 | No  | 5.0×3.0×2.5 | Biliary enteric<br>anastomosis<br>+gastrojejunostomy | 0.4  | 55 | No       | No     | No         |
| 23 | F | 59 | III | T4N1M0 | Body | 80 | No  | 1.7×2.5×2.7 | No                                                   | 0.5  | 18 | No       | GEM(3) | No         |
| 24 | F | 54 | III | T4N1M0 | Body | 70 | No  | 4.0×4.0×4.0 | No                                                   | 0.5  | 37 | No       | GEM(4) | No         |
| 25 | M | 73 | III | T4N1M0 | Head | 80 | No  | 5.0×2.5×1.5 | No                                                   | 0.4  | 24 | No       | No     | No         |
| 26 | F | 46 | III | T4N0M0 | Body | 80 | No  | 3.7×3.2×2.7 | No                                                   | 0.5  | 56 | No       | No     | No         |
| 27 | M | 78 | III | T4N0M0 | Body | 80 | No  | 3.9×2.7×1.5 | No                                                   | 0.5  | 34 | No       | No     | No         |
| 28 | F | 55 | III | T4N1M0 | Body | 80 | No  | 2.0×2.0×2.5 | No                                                   | 0.4  | 12 | No       | No     | No         |

Abbreviations: KPS = Karnofsky Performance Status, EBRT = External Beam Radiotherapy, CT = Chemotherapy, PTCD = Percutaneous Transhepatic Choledochus Drainage, GEM = Gemcitabine, PTX = Paclitaxel.
