# Supplementary material for: The investigation of 125I seed implantation as a salvage modality for unresectable pancreatic carcinoma
Source: PubMed Central journal article supplement (PMC3892087; doi:10.1186/1756-9966-32-106), 2013-12-27
Supplement: 1756-9966-32-106-S2.pdf [file 1756-9966-32-106-S2.pdf]

**Additional Table 2.****Results using intraoperative ultrasound-guided implantation of <sup>125</sup>I seeds for patients with locally advanced unresectable pancreatic cancer**

| No | D <sub>90</sub> (Gy) | NRS of pre-seed implant | NRS of post-seed implant | Response rate (pain) | Response rate (tumor) | Local control (months) | Overall survival (months) | Cause of death |
|----|----------------------|-------------------------|--------------------------|----------------------|-----------------------|------------------------|---------------------------|----------------|
| 1  | 120                  | No                      | No                       |                      | CR                    | 28                     | 28                        | M              |
| 2  | 110                  | Moderate                | No                       | Good Response        | CR                    | 24                     | 24                        | M              |
| 3  | 140                  | Moderate                | No                       | Good Response        | PR                    | 48                     | 48                        | M              |
| 4  | 115                  | Severe                  | No                       | Good Response        | PR                    | 6                      | 9                         | M+LR           |
| 5  | 120                  | No                      | No                       |                      | PR                    | 10                     | 10                        | M              |
| 6  | 80                   | Severe                  | Mild                     | Medium Response      | PD                    | 3                      | 8                         | LR             |
| 7  | 115                  | Severe                  | Mild                     | Medium Response      | PR                    | 5                      | 5                         | Heart Disease  |
| 8  | 60                   | Moderate                | No                       | Good Response        | PR                    | 3                      | 3                         | M              |
| 9  | 140                  | No                      | No                       |                      | PR                    | 9                      | 9                         | M              |
| 10 | 163                  | No                      | No                       |                      | PR                    | 7                      | 7                         | N/A            |
| 11 | 120                  | No                      | No                       |                      | CR                    | 14                     | 14                        | M              |
| 12 | 130                  | Moderate                | Mild                     | Medium Response      | PR                    | 14                     | 14                        | M              |
| 13 | 120                  | Severe                  | Moderate                 | Poor Respons         | PR                    | 13                     | 13                        | M              |
| 14 | 80                   | Severe                  | Mild                     | Medium Response      | PD                    | 3                      | 9                         | LR+M           |
| 15 | 125                  | No                      | No                       |                      | PD                    | 3                      | 8                         | LR             |
| 16 | 140                  | Severe                  | No                       | Good Response        | PR                    | 11                     | 11                        | M              |
| 17 | 151                  | No                      | No                       |                      | PR                    | 14                     | 14                        | M              |
| 18 | 115                  | Severe                  | No                       | Good Response        | SD                    | 13                     | 13                        | M              |
| 19 | 119                  | No                      | No                       |                      | PR                    | 10                     | 10                        | M              |
| 20 | 106                  | Severe                  | Mild                     | Medium Response      | PR                    | 9                      | 9                         | M              |
| 21 | 121                  | No                      | No                       |                      | PR                    | 9                      | 9                         | M              |
| 22 | 161                  | Moderate                | No                       | Good Response        | PR                    | 9                      | 9                         | M              |
| 23 | 160                  | Severe                  | Mild                     | Medium Response      | SD                    | 10                     | 10                        | M              |
| 24 | 94                   | No                      | No                       |                      | PR                    | 8                      | 8                         | M              |
| 25 | 95                   | No                      | No                       |                      | SD                    | 5                      | 5                         | M              |
| 26 | 97                   | Moderate                | No                       | Good Response        | PR                    | 10                     | 10                        | M              |

|           |            |                 |             |                        |           |           |           |          |
|-----------|------------|-----------------|-------------|------------------------|-----------|-----------|-----------|----------|
| <b>27</b> | <b>162</b> | <b>Moderate</b> | <b>Mild</b> | <b>Medium Response</b> | <b>PR</b> | <b>11</b> | <b>11</b> | <b>M</b> |
| <b>28</b> | <b>93</b>  | <b>Severe</b>   | <b>Mild</b> | <b>Medium Response</b> | <b>PR</b> | <b>5</b>  | <b>5</b>  | <b>M</b> |

Abbreviations:  $D_{90}$  = The reference dose that at least 90% of the tumor volume received, NRS = Numerical rating scale, CR = Complete Response, PR = Partial Response, SD = Stable Disease, PD = Progressive Disease, LR = Local Recurrence, M = Metastasis.
